# Supplementary material for: Life span extension by glucose restriction is abrogated by methionine supplementation: Cross-talk between glucose and methionine and implication of methionine as a key regulator of life span
Source: PubMed Central journal article supplement — Sci Adv. 2020 Aug 5;6(32):eaba1306. doi: 10.1126/sciadv.aba1306 (PMC7406366; doi:10.1126/sciadv.aba1306), 2020-08-05
Supplement: aba1306_SM.pdf [file aba1306_SM.pdf]

## Supplementary Materials for

### **Life span extension by glucose restriction is abrogated by methionine supplementation: Cross-talk between glucose and methionine and implication of methionine as a key regulator of life span**

Ke Zou, Silvia Rouskin, Kevin Dervishi, Mark A. McCormick, Arjun Sasikumar, Changhui Deng, Zhibing Chen, Matt Kaeberlein, Rachel B. Brem, Michael Polymenis, Brian K. Kennedy, Jonathan S. Weissman, Jiashun Zheng\*, Qi Ouyang\*, Hao Li\*

\*Corresponding author. Email: [jiashun@genome.ucsf.edu](mailto:jiashun@genome.ucsf.edu) (J.Z.); [qi@pku.edu.cn](mailto:qi@pku.edu.cn) (Q.O.); [haoli@genome.ucsf.edu](mailto:haoli@genome.ucsf.edu) (H.L.)

Published 5 August 2020, *Sci. Adv.* **6**, eaba1306 (2020)  
DOI: 10.1126/sciadv.aba1306

#### **The PDF file includes:**

Figs. S1 to S3

#### **Other Supplementary Material for this manuscript includes the following:**

(available at [advances.sciencemag.org/cgi/content/full/6/32/eaba1306/DC1](https://advances.sciencemag.org/cgi/content/full/6/32/eaba1306/DC1))

Supplemental Files S1 to S3

Fig S1

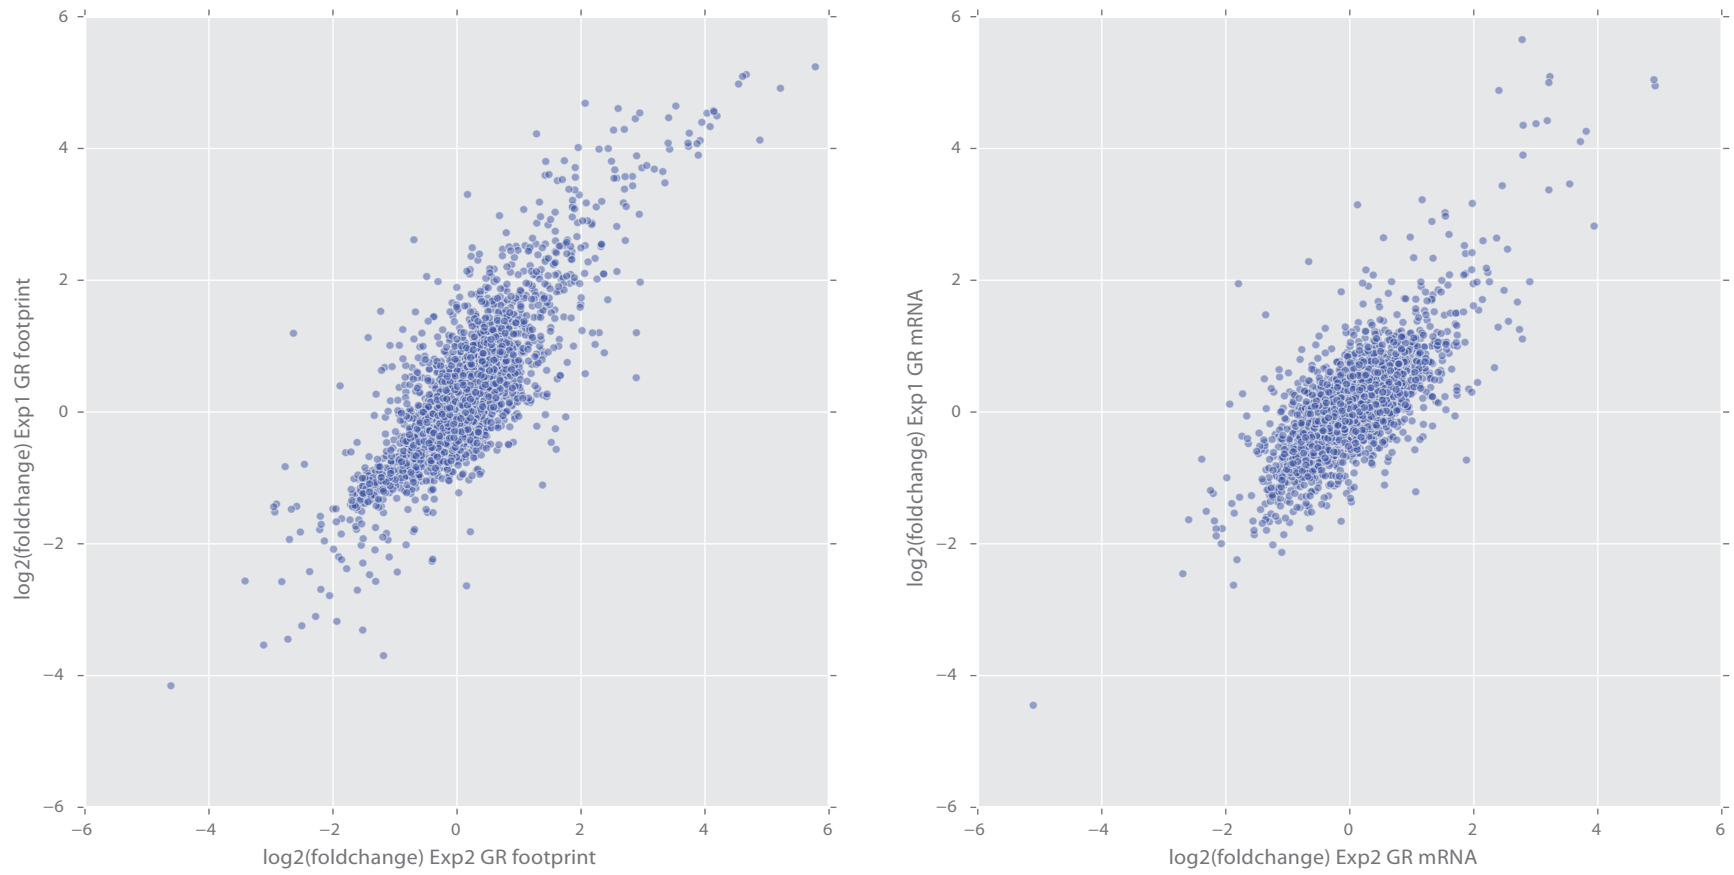

Figure S1: Comparison of GR induced fold changes of ribosome footprint (left) and mRNA (right) in two independent experiments with different GR protocols (see Methods)

Fig S2

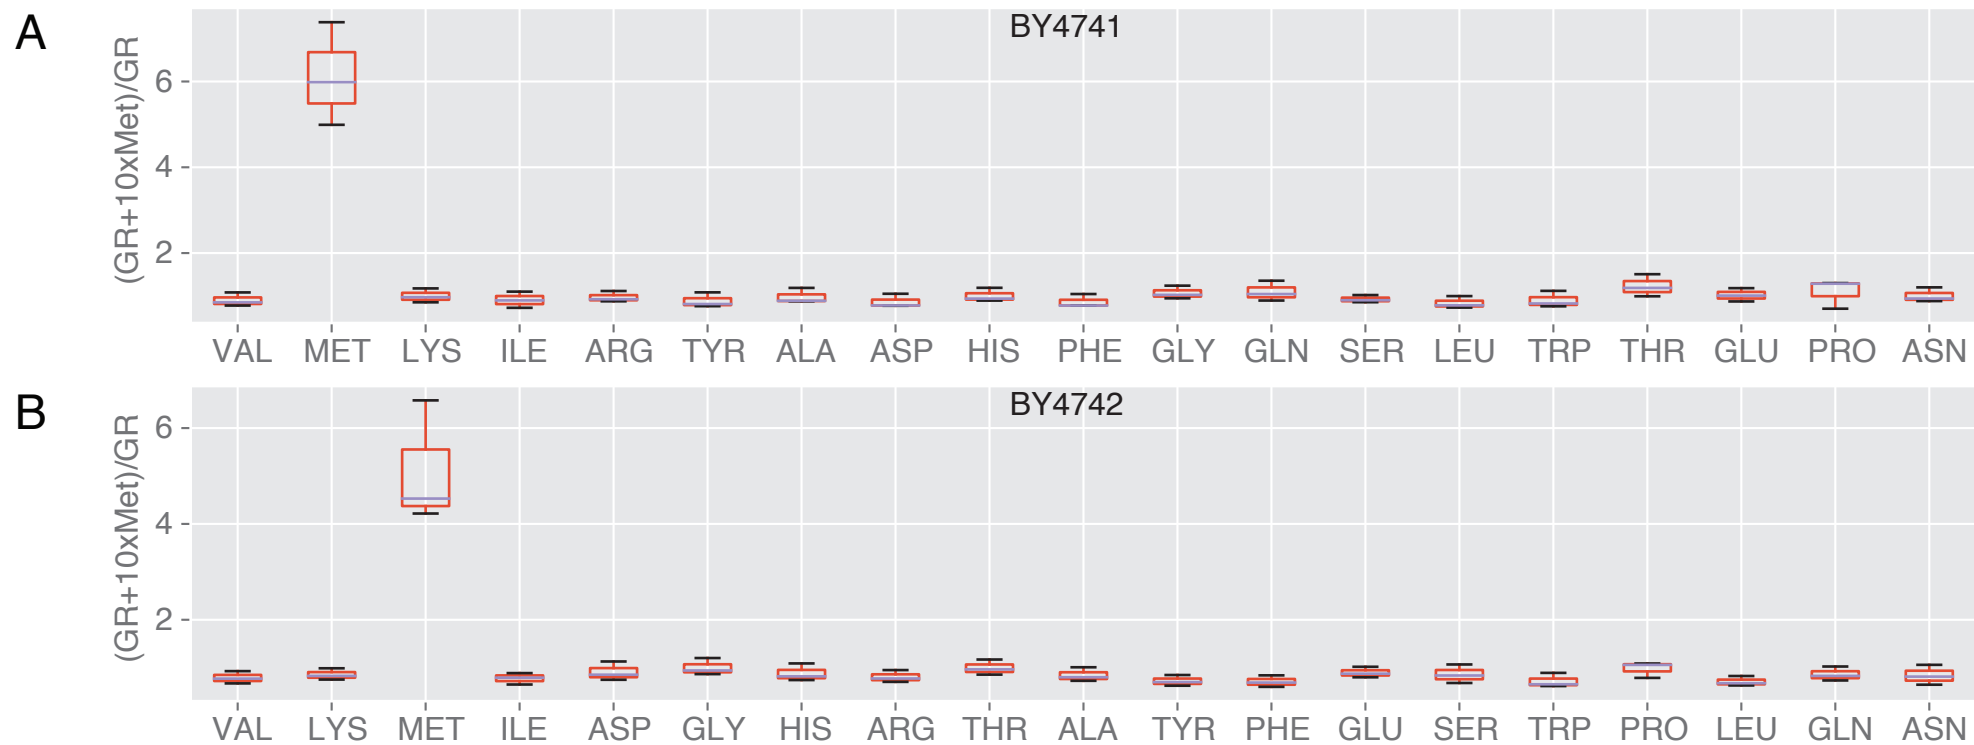

Figure S2: External supplementation of methionine under GR condition only increases the concentration of methionine, not any other amino acids. Shown are ratios of concentrations under GR+10xMet vs. GR in two different strains BY4741 (A) and BY 4742 (B)

Fig S3

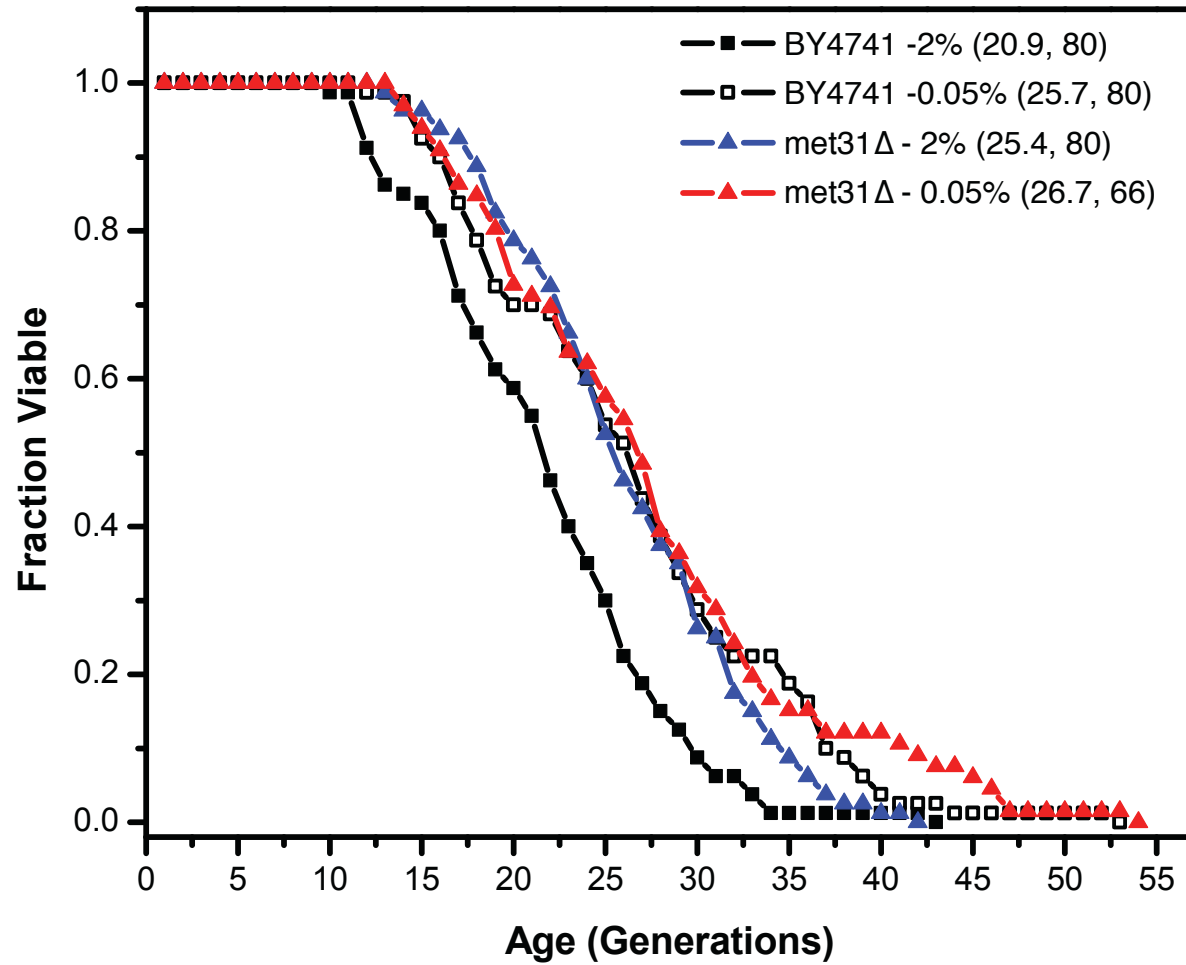

Figure S3: MET31 deletion extends lifespan under SD (2% glucose) condition and GR no longer extends the lifespan of the MET31 deletion mutant. MET31 deletion mutant was derived from the BY4741 strain.
